# Supplementary material for: Phenanthrenes from Juncus Compressus Jacq. with Promising Antiproliferative and Anti-HSV-2 Activities
Source: PubMed Central journal article supplement (PMC6222307; doi:10.3390/molecules23082085), 2018-08-20
Supplement: molecules-23-02085-s001.pdf [file molecules-23-02085-s001.pdf]

## Supporting Information

### Phenanthrenes from *Juncus compressus* Jacq. with promising antiproliferative and anti- HSV-2 activities

Csaba Bús<sup>1</sup>, Norbert Kúsz<sup>1</sup>, Gusztáv Jakab<sup>2</sup>, Seyyed Ashkan Senobar Tahaei<sup>3</sup>, István Zupkó<sup>3,4</sup>, Valéria  
Endrész<sup>5</sup>, Anita Bogdanov<sup>5</sup>, Katalin Burián<sup>5</sup>, Boglárka Csupor-Löffler<sup>1</sup>, Judit Hohmann<sup>1,4</sup>, Andrea  
Vasas<sup>1\*</sup>

<sup>1</sup> *Department of Pharmacognosy, University of Szeged, 6720 Szeged, Hungary*

<sup>2</sup> *Institute of Environmental Sciences, Faculty of Water and Environmental Management, Szent István  
University Szarvas, H-5540 Szarvas, Hungary*

<sup>3</sup> *Department of Pharmacodynamics and Biopharmacy, University of Szeged, 6720 Szeged, Hungary*

<sup>4</sup> *Interdisciplinary Centre of Natural Products, University of Szeged, 6720 Szeged, Hungary*

<sup>5</sup> *Department of Medical Microbiology and Immunobiology, University of Szeged, 6720 Szeged,  
Hungary*

\*Author to whom correspondence should be addressed.

## Table of Contents

|                                                                                                     |         |
|-----------------------------------------------------------------------------------------------------|---------|
| <b>Figure S1.</b><br><sup>1</sup> H-NMR spectrum of compound <b>1</b> (500 MHz, CDCl <sub>3</sub> ) | Page S3 |
| <b>Figure S2.</b><br>JMOD spectrum of compound <b>1</b> (125 MHz, CDCl <sub>3</sub> )               | Page S3 |
| <b>Figure S3.</b><br>HSQC spectrum of compound <b>1</b>                                             | Page S4 |
| <b>Figure S4.</b><br><sup>1</sup> H- <sup>1</sup> H-COSY spectrum of compound <b>1</b>              | Page S4 |
| <b>Figure S5.</b><br>HMBC spectrum of compound <b>1</b>                                             | Page S5 |
| <b>Figure S6.</b><br>NOESY spectrum of compound <b>1</b>                                            | Page S5 |
| <b>Figure S7.</b><br><sup>1</sup> H-spectrum of compound <b>2</b> (500 MHz, CDCl <sub>3</sub> )     | Page S6 |
| <b>Figure S8.</b><br>JMOD spectrum of compound <b>2</b> (125 MHz, CDCl <sub>3</sub> )               | Page S6 |
| <b>Figure S9.</b><br>HSQC spectrum of compound <b>2</b>                                             | Page S7 |
| <b>Figure S10.</b><br><sup>1</sup> H- <sup>1</sup> H-COSY spectrum of compound <b>2</b>             | Page S7 |
| <b>Figure S11.</b><br>HMBC spectrum of compound <b>2</b>                                            | Page S8 |
| <b>Figure S12.</b><br>HMBC spectrum of compound <b>2</b>                                            | Page S8 |
| <b>Figure S13.</b><br>Antiviral effect of compounds <b>1–9</b> .                                    | Page S9 |

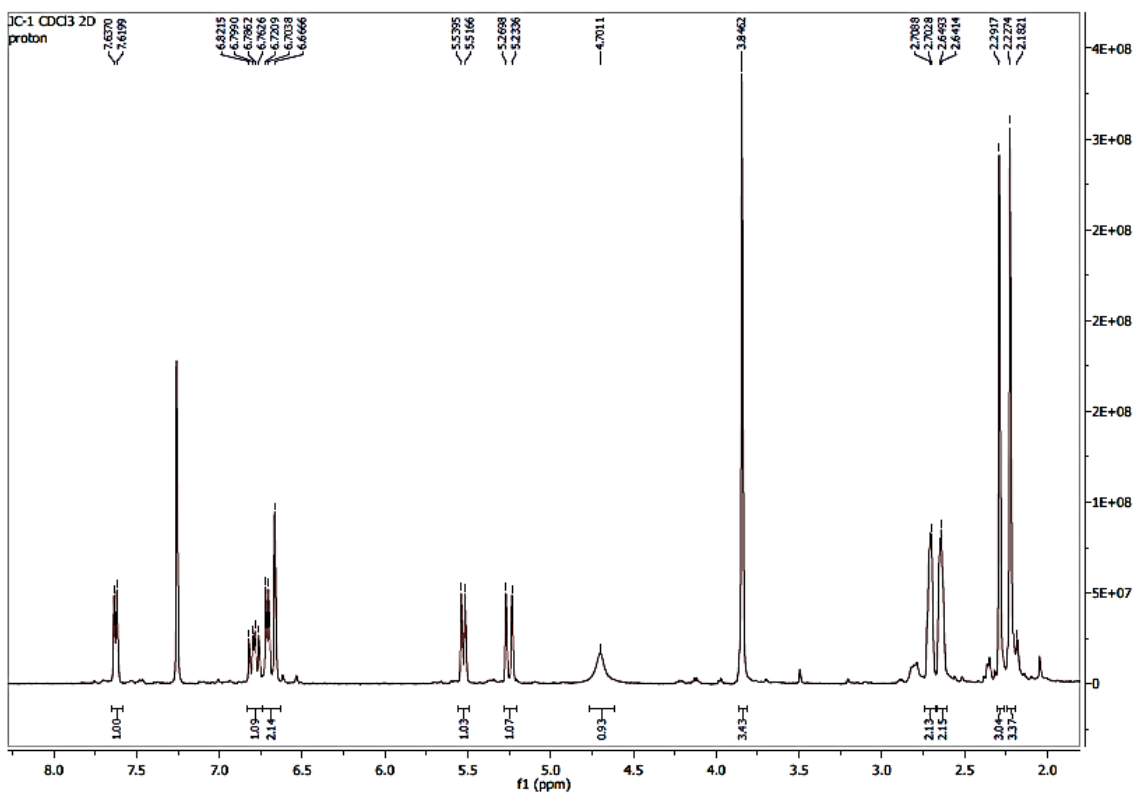

Figure S1. <sup>1</sup>H-NMR spectrum of compound **1** (500 MHz, CDCl<sub>3</sub>)

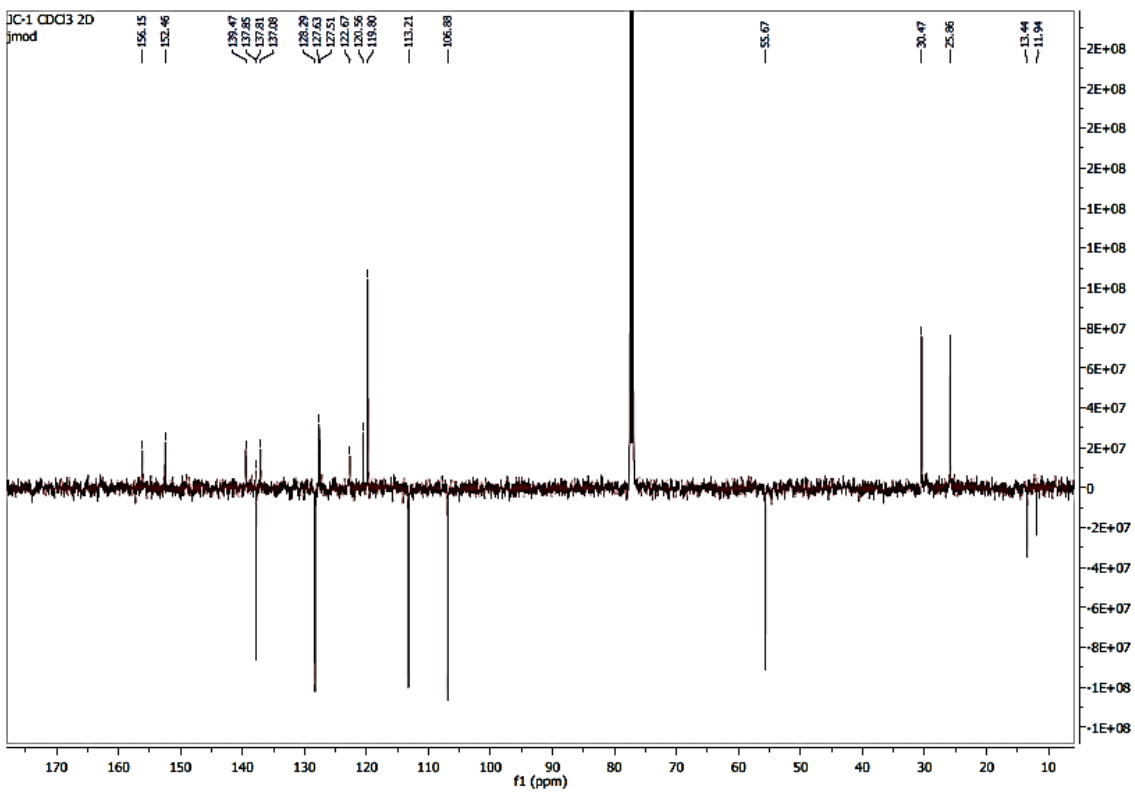

Figure S2. JMOD spectrum of compound **1** (125 MHz, CDCl<sub>3</sub>)

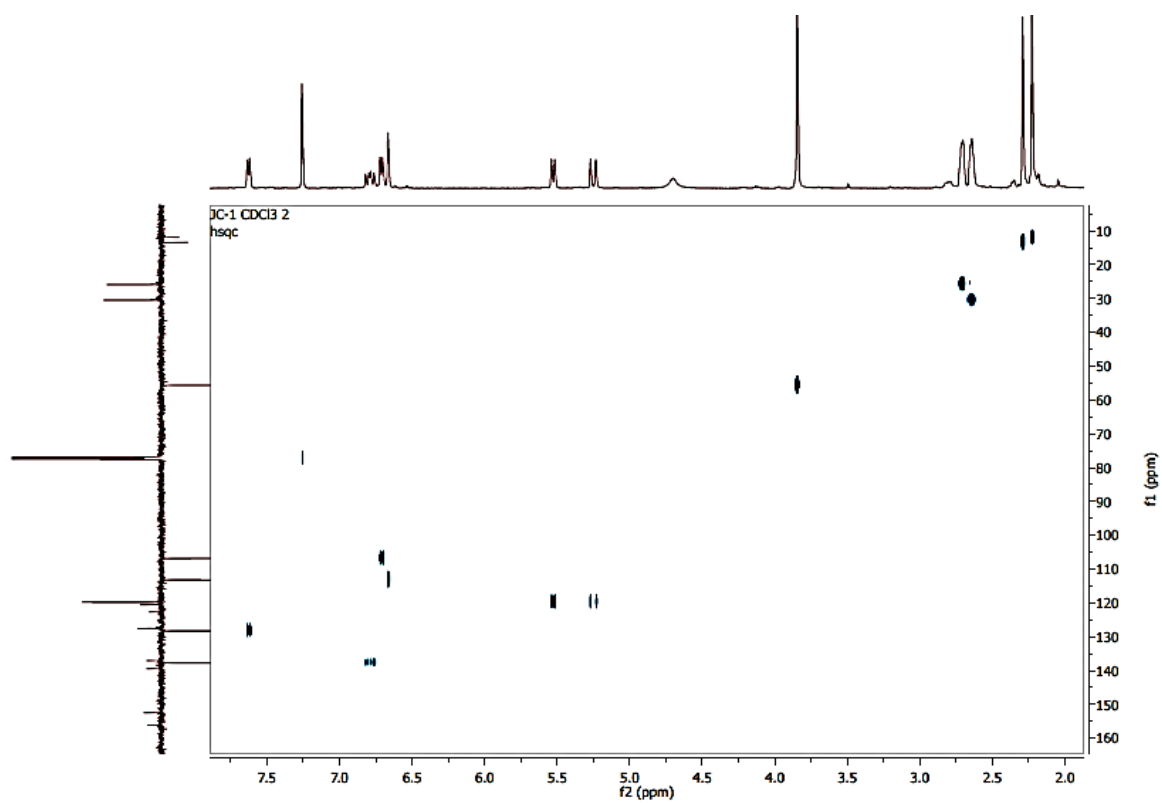

Figure S3. HSQC spectrum of compound 1

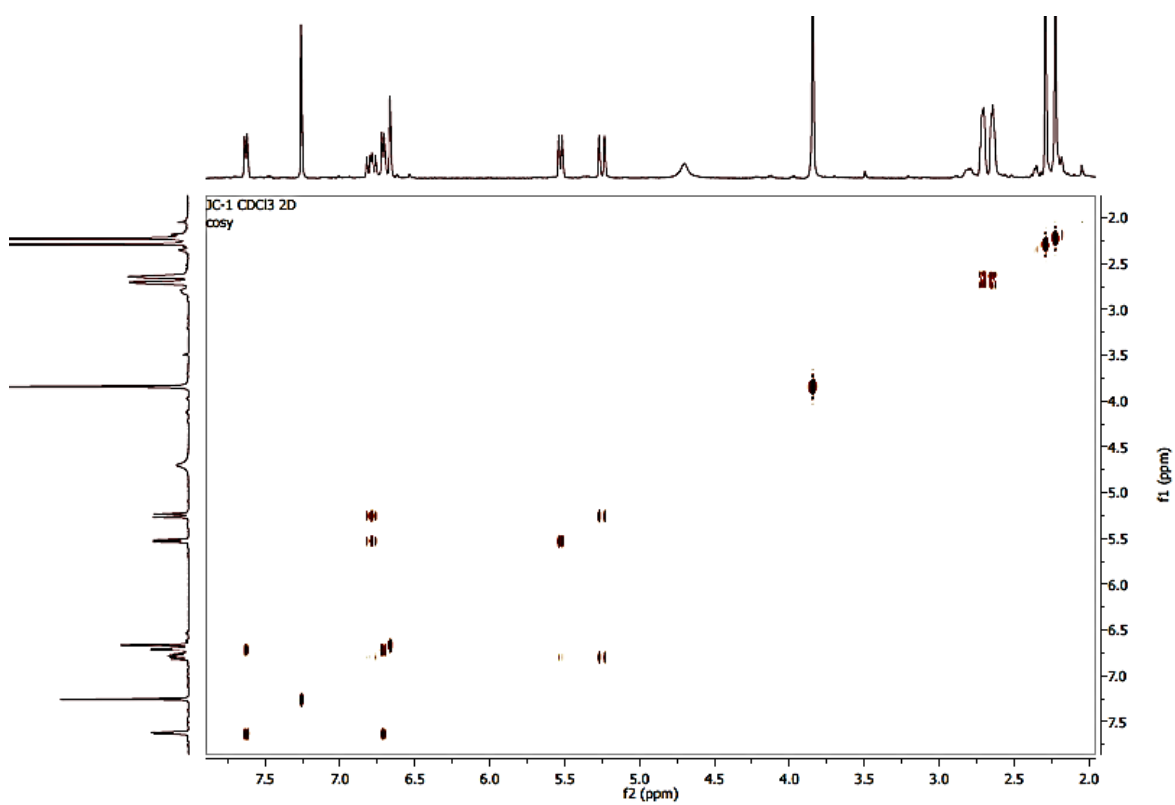

Figure S4.  $^1\text{H}$ - $^1\text{H}$ -COSY spectrum of compound 1

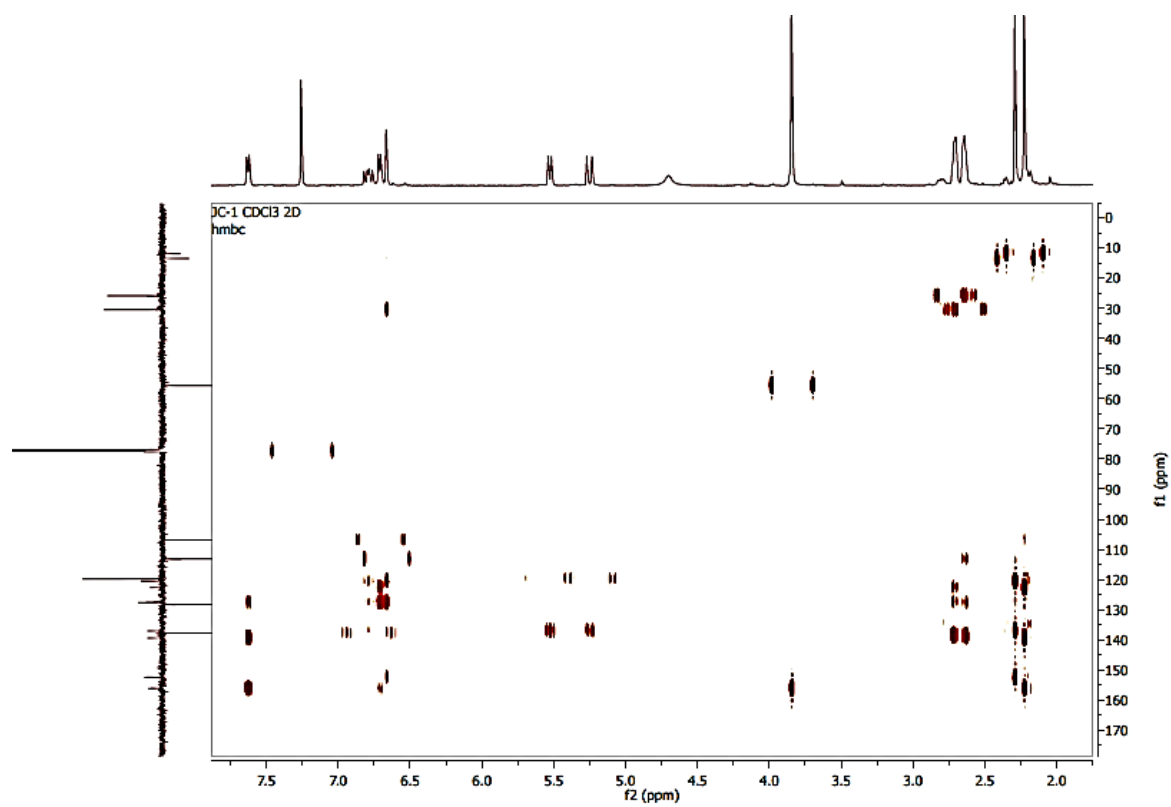

Figure S5. HMBC spectrum of compound **1**

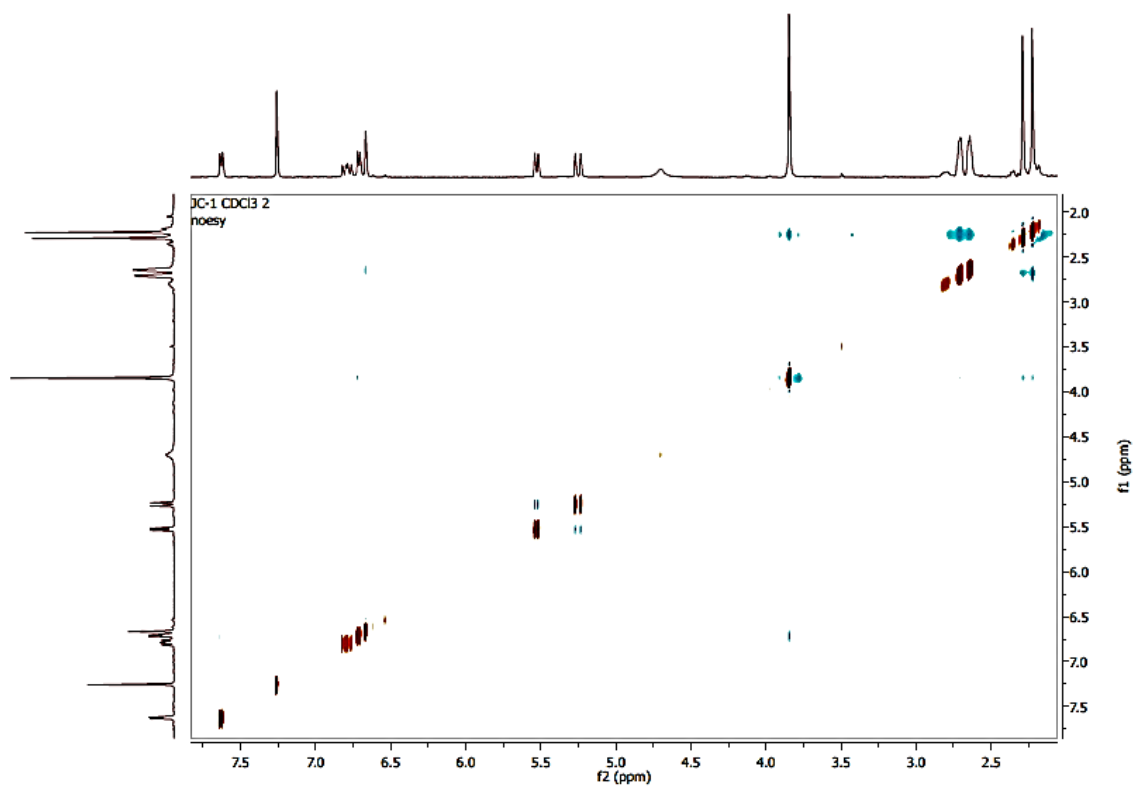

Figure S6. NOESY spectrum of compound **1**

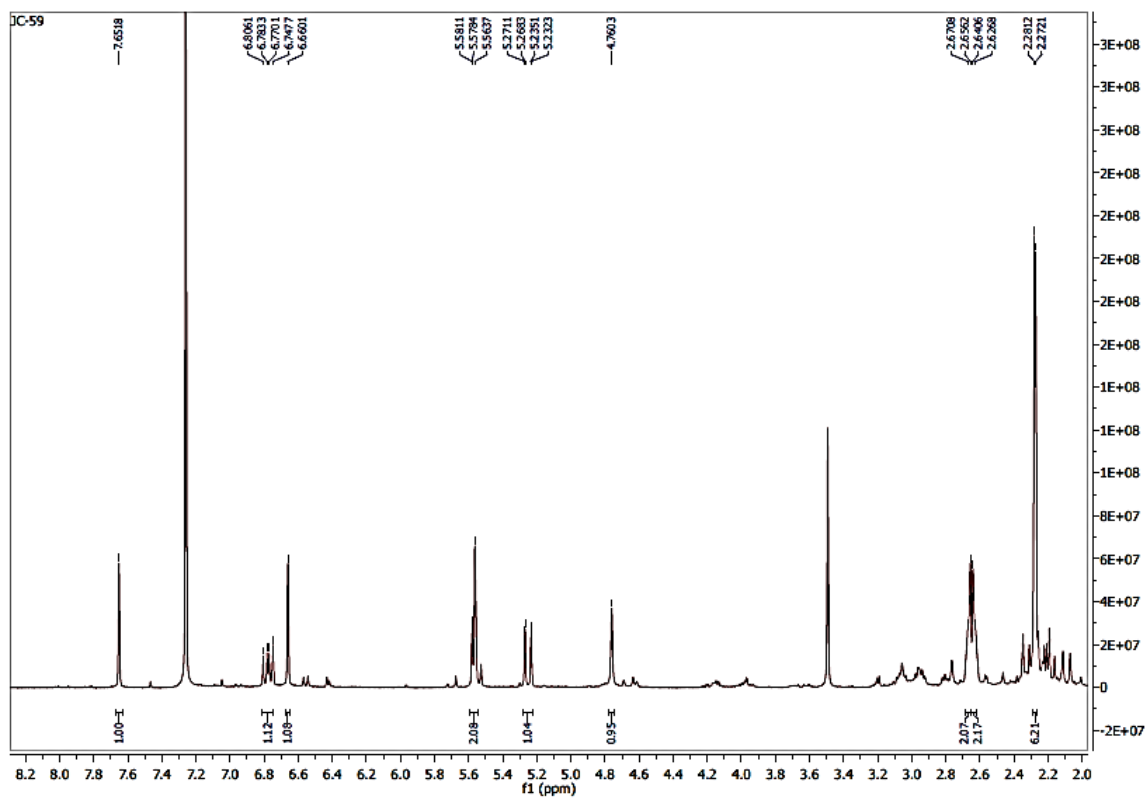

Figure S7.  $^1\text{H}$ -spectrum of compound **2** (500 MHz,  $\text{CDCl}_3$ )

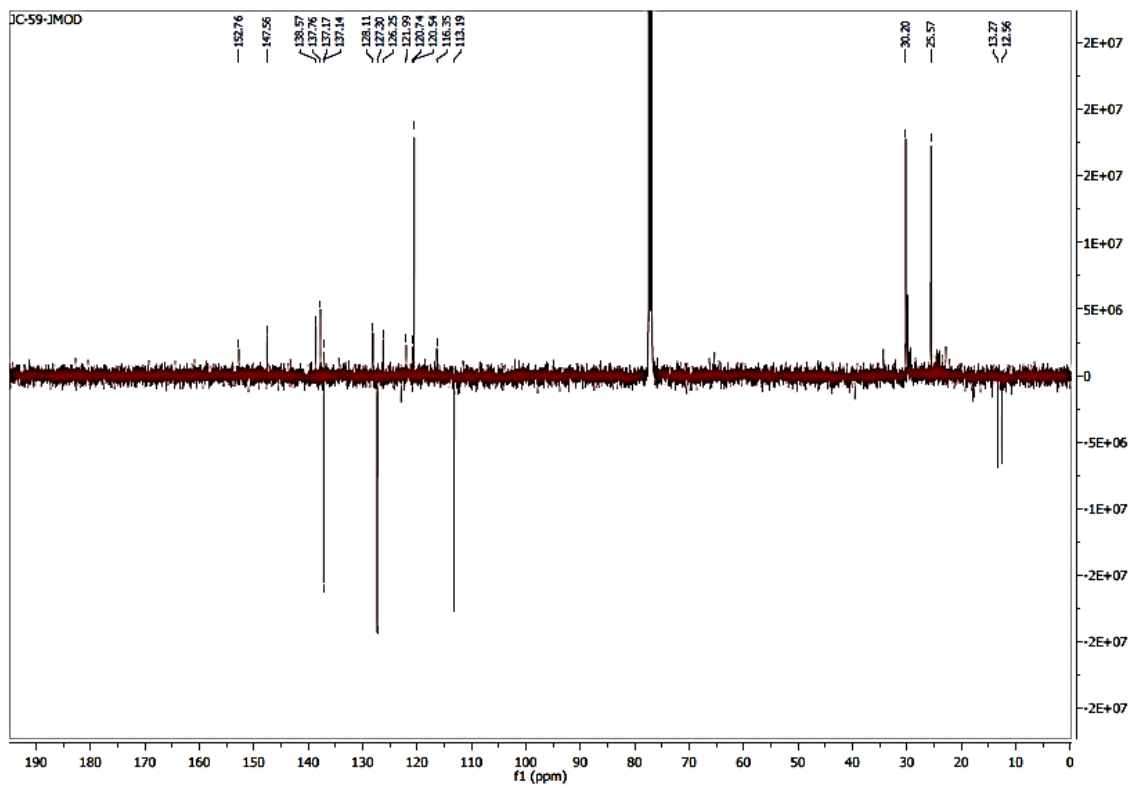

Figure S8. JMOD spectrum of compound **2** (125 MHz,  $\text{CDCl}_3$ )

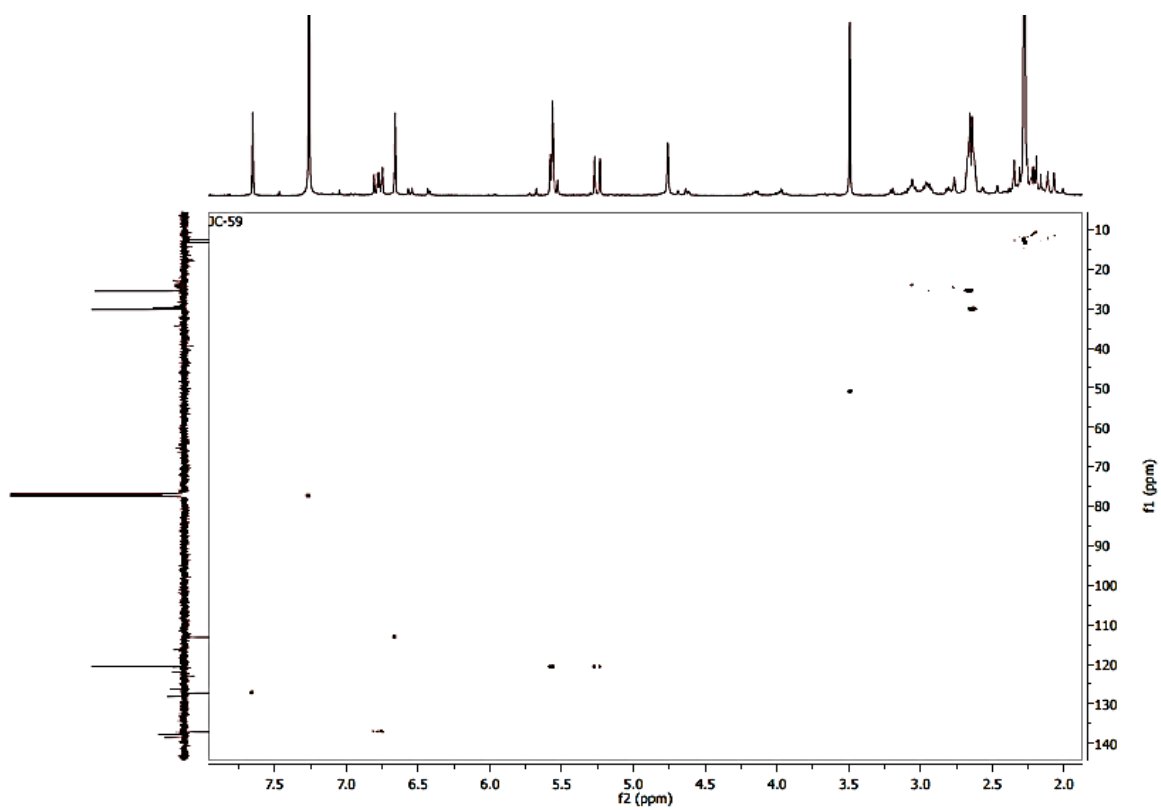

Figure S9. HSQC spectrum of compound 2

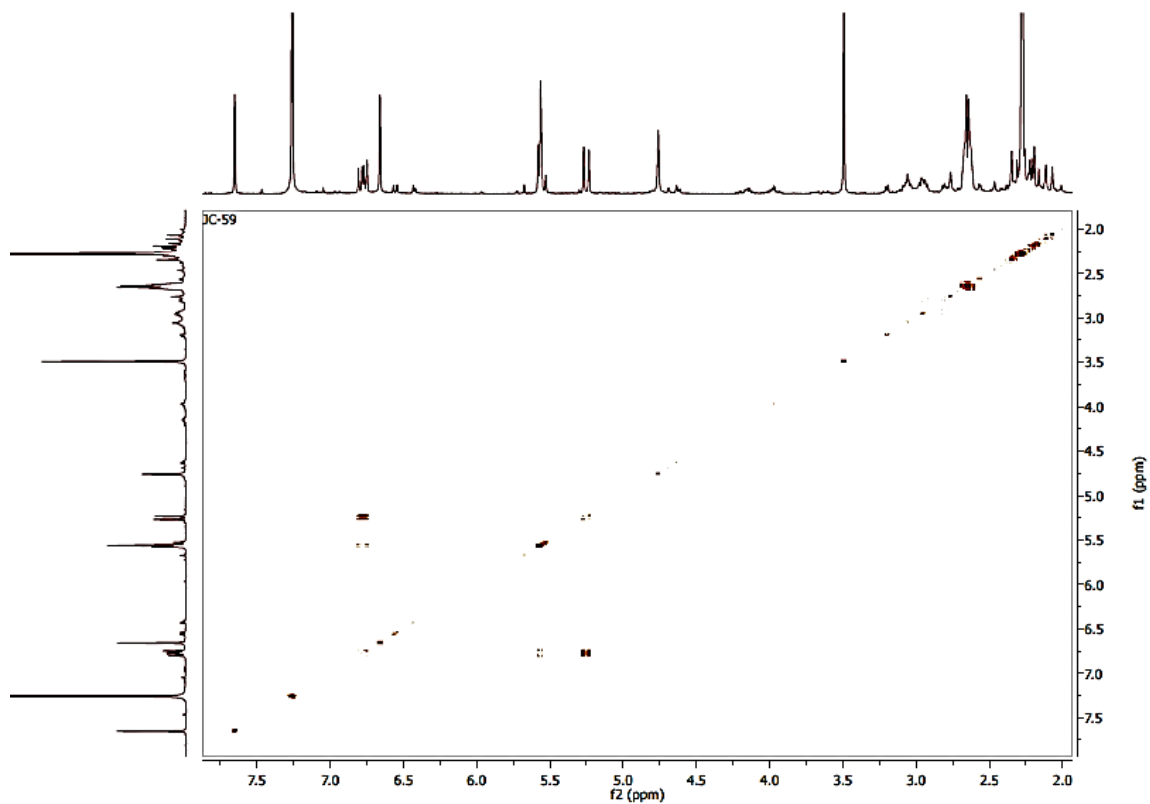

Figure S10.  $^1\text{H}$ - $^1\text{H}$ -COSY spectrum of compound 2

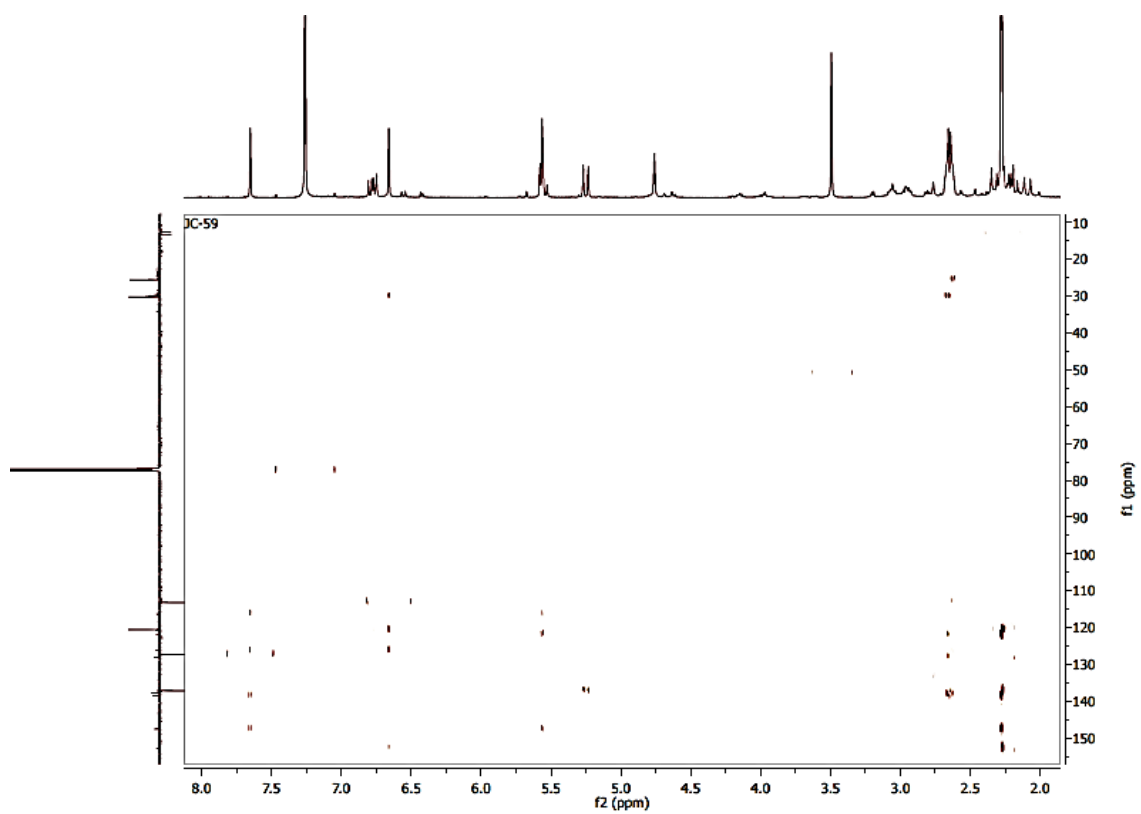

Figure S11. HMBC spectrum of compound 2

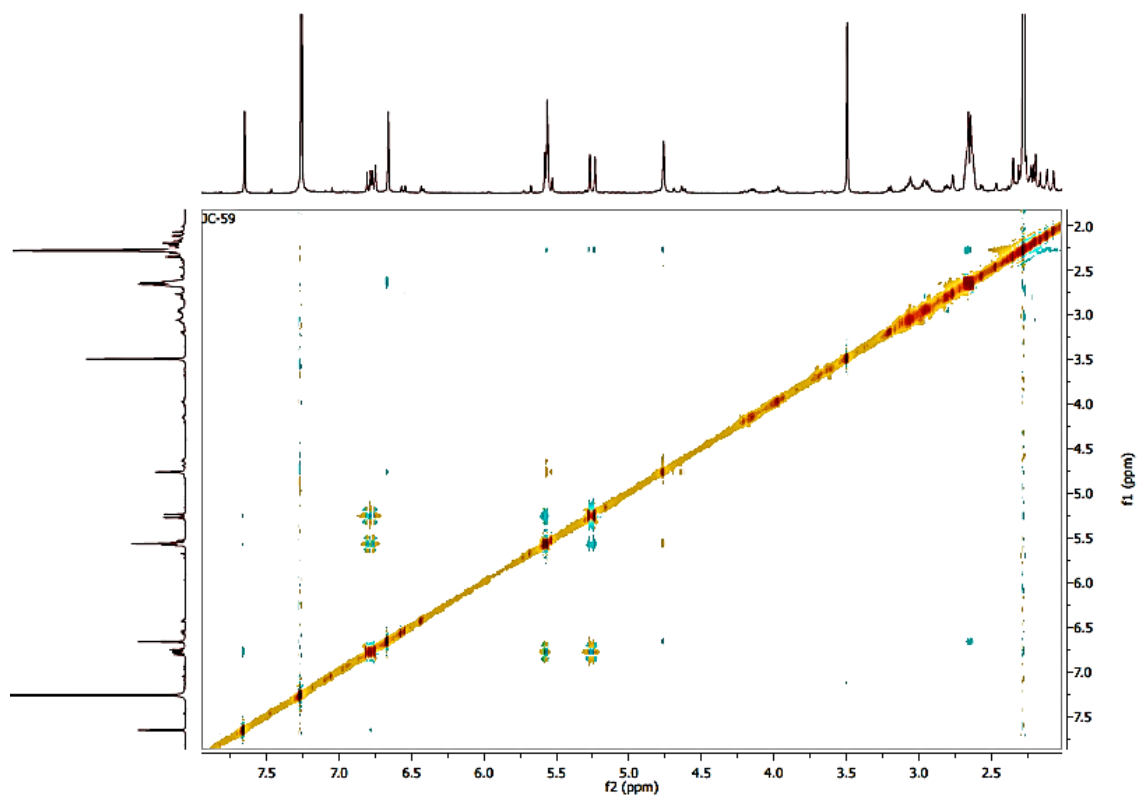

Figure S12. HMBC spectrum of compound 2



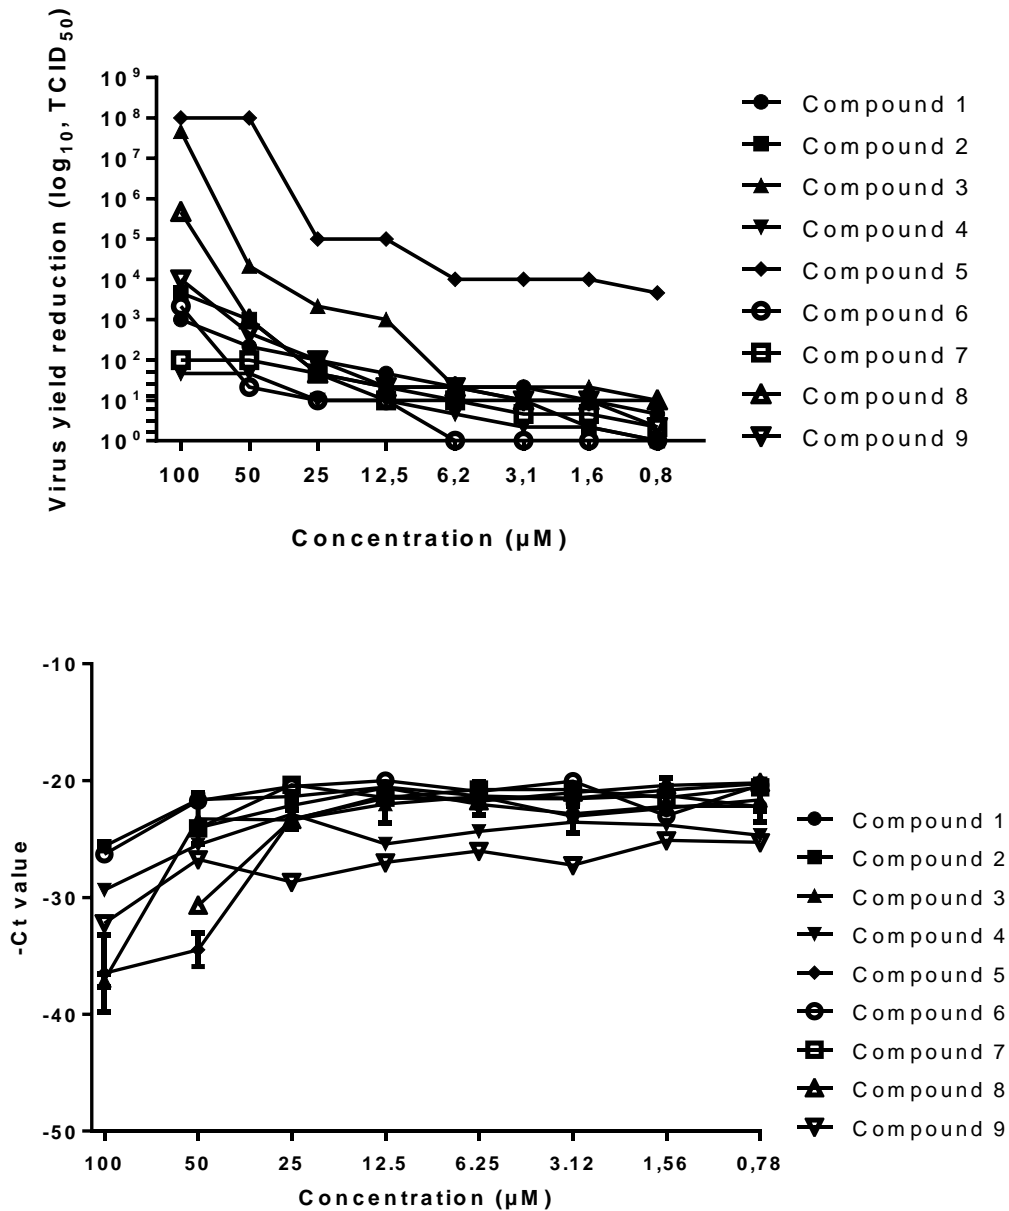

**Figure S13.** Antiviral effect of compounds 1–9.

Vero cells were infected with HSV-2 (MOI 0.01) in the presence of various concentrations of different compounds for 24 h (n=4). At 24 h post infection, the cells were lysed and the virus yield reducing effect of the compounds was evaluated by comparing the yield to that seen on untreated Vero cells. The HSV-2 DNA concentration in the lysates was measured by direct qPCR (Data represent the average -Ct values +/- standard deviations).
